# Supplementary material for: An edible microbial cellulose-based triboelectric nanogenerator: a sustainable approach for energy harvesting
Source: Royal Society of Chemistry journal article supplement (doi:10.1039/d5ma01186h), 2026-01-01
Supplement: d5ma01186h1.pdf [file d5ma01186h1.pdf]

## Supplementary Information

### An edible microbial cellulose-based triboelectric nanogenerator: a sustainable approach for energy harvesting

**Authors:** Raj Ankit<sup>1</sup>, Simranjeet Kaur<sup>2</sup>, Shinar Athwal<sup>3</sup>, Taranveer Kaur<sup>4</sup>, and Jayant Kolte<sup>1</sup>

**Affiliation:**

<sup>1</sup>Department of Physics and Materials Science, Thapar Institute of Engineering and Technology, Patiala, Punjab, India

<sup>2</sup>Department of Physics, Punjabi University, Patiala, Punjab, India

<sup>3</sup>Department of Biotechnology, Thapar Institute of Engineering and Technology, Patiala, Punjab, India

<sup>4</sup>Department of Science, Public College Samana, Patiala, Punjab, India

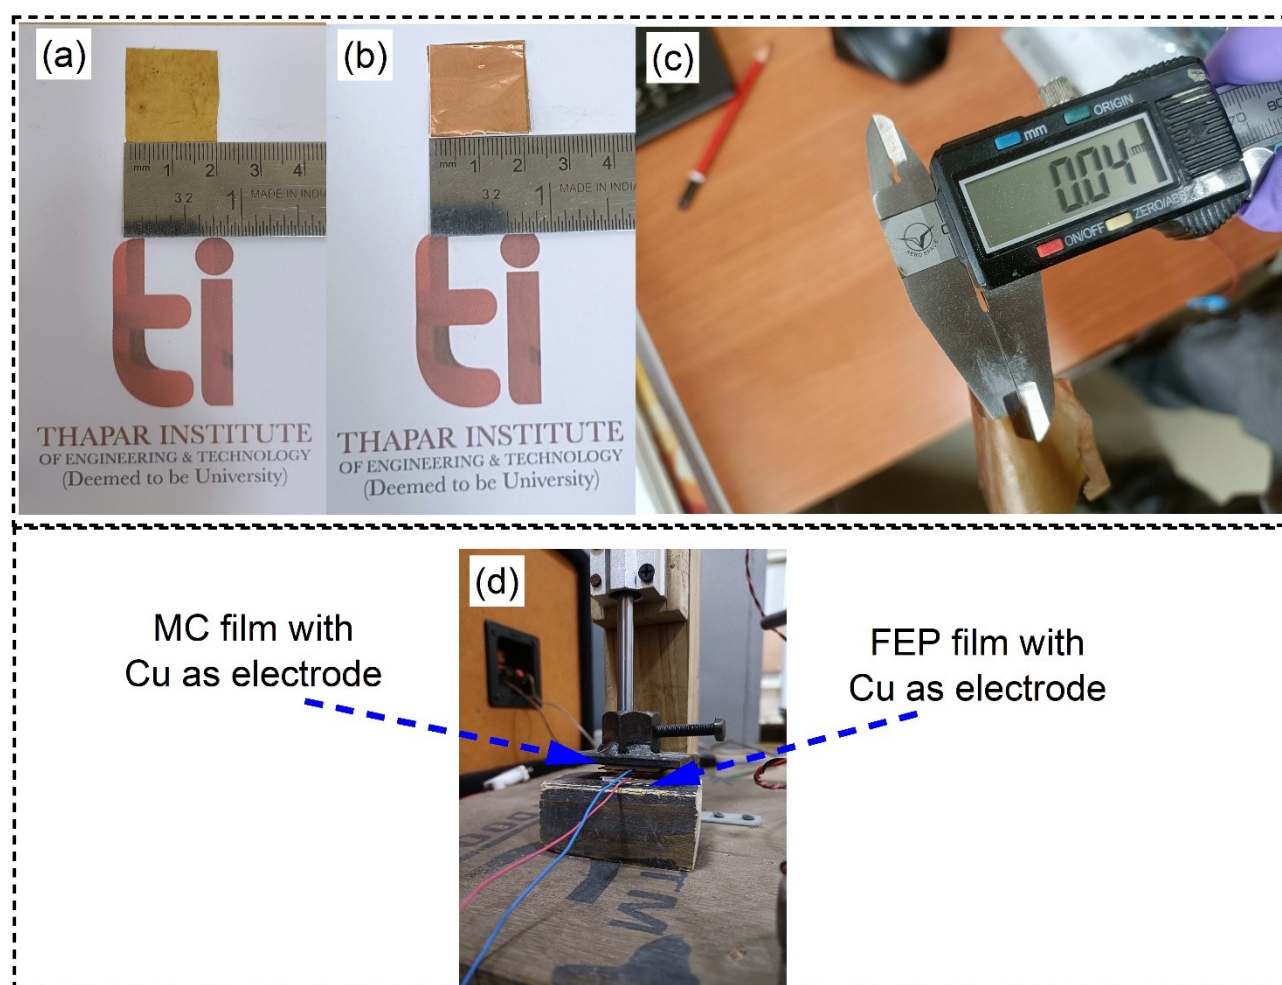

**Supplementary figure S1** Photographic image of (a) MC film of size  $2 \times 2 \text{ cm}^2$ , (b) Copper (Cu)

as electrode, (c) Thickness of the MC film (40  $\mu\text{m}$ ) measured using vernier caliper, and (d) Pictorial presentation of MC-TENG fabricated on linear motor-based tapping device.

**File name:** supplementary video V1

**Description:** Video demonstrating more than 50 red LEDs connected in series are turned on directly by the contact-separation of MC-TENG.
